# Supplementary material for: Deciphering the Virome of the Pimple-Shaped ‘Yali’ Pear Fruit through High-Throughput Sequencing
Source: MDPI journal article supplement (doi:10.3390/horticulturae10040311), 2024-03-22
Supplement: s1 [file s1]

**Table S1.** Movement proteins and properties of ASGV.

| Accession No. | Host                                        | Country     |
|---------------|---------------------------------------------|-------------|
| ALF38088.1    | <i>Pyrus sinkiangensis</i> T. T. Yu         | China       |
| AND78203.1    | <i>P. communis</i> L.                       | China       |
| ANB82432.1    | <i>P. pyrifolia</i>                         | China       |
| BBJ35803.1    | <i>P. pyrifolia</i>                         | South Korea |
| BBJ35801.1    | <i>P. pyrifolia</i>                         | South Korea |
| AIA96306.1    | <i>Malus domestica</i>                      | China       |
| APT69209.1    | <i>M. domestica</i>                         | China       |
| AFG28409.1    | <i>M. domestica</i>                         | China       |
| AHW47896.1    | <i>M. domestica</i>                         | China       |
| QDK54739.1    | <i>M. domestica</i>                         | Brazil      |
| QDK54737.1    | <i>M. domestica</i>                         | Brazil      |
| QDK54735.1    | <i>M. domestica</i>                         | Brazil      |
| AFM37509.1    | <i>M. domestica</i>                         | Germany     |
| CBY84302.1    | <i>M. domestica</i>                         | India       |
| SBO15775.1    | <i>M. domestica</i>                         | India       |
| QJZ28106.1    | <i>Citrus</i> sp.                           | China       |
| QJZ28111.1    | <i>C.</i> sp.                               | China       |
| AYN44467.1    | <i>C.</i> sp.                               | China       |
| AFU07532.1    | <i>C.</i> sp.                               | China       |
| AYN44453.1    | <i>C.</i> sp.                               | China       |
| AYN44465.1    | <i>C.</i> sp.                               | Japan       |
| BBA57166.1    | <i>C.</i> sp.                               | Japan       |
| BBA57164.1    | <i>C.</i> sp.                               | Japan       |
| AYN44455.1    | <i>C.</i> sp.                               | USA         |
| AYN44449.1    | <i>C.</i> sp.                               | USA         |
| AYF52913.1    | <i>C. maxima</i>                            | China       |
| AYF52911.1    | <i>C. maxima</i>                            | China       |
| AYF52909.1    | <i>C. maxima</i>                            | China       |
| AYN44463.1    | <i>C. citron</i>                            | China       |
| AYN44461.1    | <i>C. citron</i>                            | China       |
| AYN44459.1    | <i>C. citron</i>                            | China       |
| BAU79372.1    | <i>C. junos</i>                             | Japan       |
| BAS32857.1    | <i>C. tamurana</i>                          | Japan       |
| ACD88338.1    | <i>C. meyer lemon</i>                       | USA         |
| AYN44457.1    | <i>C. meyer lemon</i>                       | USA         |
| AYN44447.1    | <i>C. meyer lemon</i>                       | USA         |
| AYN44445.1    | <i>C. meyer lemon</i>                       | USA         |
| AYN44451.1    | <i>C. hirado buntan</i> Pummelo             | Japan       |
| QGW35765.1    | <i>Eriobotrya japonica</i> (Thunb.) Lindl.  | China       |
| QGW35763.1    | <i>E. japonica</i> (Thunb.) Lindl.          | China       |
| BAA98055.1    | Lili                                        | Japan       |
| BBK03476.1    | <i>Cnidium officinale</i>                   | South Korea |
| BBK03479.1    | <i>Cn. officinale</i>                       | South Korea |
| APT42871.1    | <i>Actinidia chinensis</i> Planch           | China       |
| AXP83297.1    | <i>Malus asiatica</i>                       | China       |
| BBA57168.1    | <i>Fortunella japonica</i> (Thunb.) Swingle | Japan       |

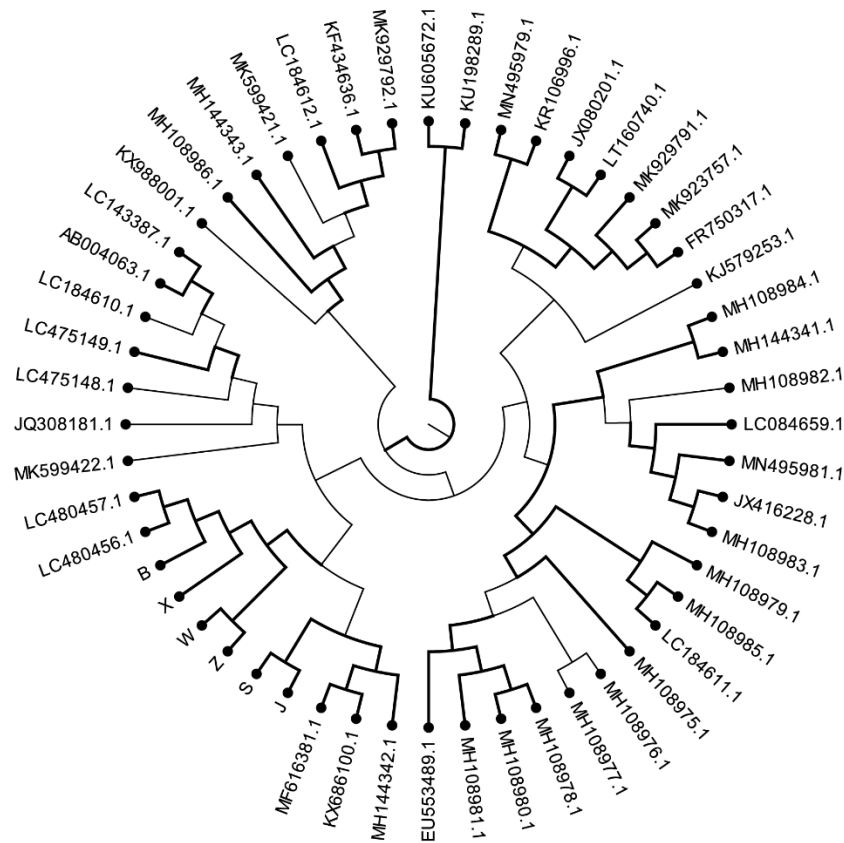

**Figure S1.** Evolutionary analysis of ASGV using nucleotide sequence of movement proteins. Neighbor joining method was used for phylogenetic tree construction with 1000 bootstrap replicates.
